# Supplementary material for: Optimizing the hydrogen adsorption strength on interfacial Ru sites with WN for high-efficiency hydrogen evolution
Source: Royal Society of Chemistry journal article supplement (doi:10.1039/d3qm00483j), 2023-01-01
Supplement: d3qm00483j1.pdf [file d3qm00483j1.pdf]

## Supporting information

### Optimizing the Hydrogen Adsorption Strength on Interfacial Ru sites with WN for High-Efficiency Hydrogen Evolution

*Guocong Liu,<sup>‡, a</sup> Jiachen Zhang,<sup>‡, a</sup> Huangyu Ren,<sup>a</sup> Yawen Tang<sup>\*, a</sup> and Hanjun Sun<sup>\*, a</sup>*

a.Jiangsu Key Laboratory of New Power Batteries, Jiangsu Collaborative Innovation Centre of Biomedical Functional Materials, School of Chemistry and Materials Science, Nanjing Normal University, Nanjing 210023, China.

E-mail addresses: tangyawen@njnu.edu.cn; hanjun.sun@njnu.edu.cn

## 1. Calculation of the total turnover frequency (TOF):

The TOF (in s<sup>-1</sup>) reported in this work is an apparent TOF value based on the number of metal atoms in catalyst, which was calculated with the following equation:

$$TOF = I/2NF$$

I: current (A) during the linear sweep voltammetry (LSV) tests in 1 M KOH

N: Number of active sites (in mol)

F: Faraday constant (96485.3 C/mol)

The factor 1/2 arrives by taking into account that two electrons are required to form one hydrogen molecule from two protons. The CV measurements of the freshly prepared Ru NP-WN/CC and Pt/C electrodes were carried out in PBS electrolyte (pH 7) to quantify the number of active sites. Assuming a one-electron redox process, the number of active sites (n) of these catalysts was calculated from the following equation:  $n = Q/2F$ , where F and Q are the Faraday constant and the whole charge of the CV curve, respectively. The factor 1/2 arrives by taking into account that two electrons are required to form one hydrogen molecule from two protons.

## 2. Calculations:

The present first principle DFT calculations are performed by Vienna Ab initio Simulation Package (VASP) with the projector augmented wave (PAW) method. The exchange-functional is treated using the generalized gradient approximation (GGA) of Perdew-Burke-Ernzerhof (PBE) functional. The energy cutoff for the plane wave basis expansion was set to 450 eV and the force on each atom less than 0.05 eV/Å was set for convergence criterion of geometry relaxation. Grimme's DFT-D3 methodology was used to describe the dispersion interactions. Partial occupancies of the Kohn-Sham orbitals were allowed using the Gaussian smearing method and a width of 0.05 eV. The Brillouin zone was sampled with Monkhorst mesh 2×2×1 through all the computational process. The self-consistent calculations apply a convergence energy threshold of 10<sup>-5</sup> eV. A 15 Å vacuum space was added to avoid the interaction between the two neighboring images.

The free energy (ΔG) on those catalysts was defined as

$$\Delta G = E_{DFT} + E_{ZPE} - T \times S$$

where  $E_{DFT}$ ,  $E_{ZPE}$ , T and S are the calculation total energy of intermediate on catalysts surface, the zero-point energy, temperature and entropy.

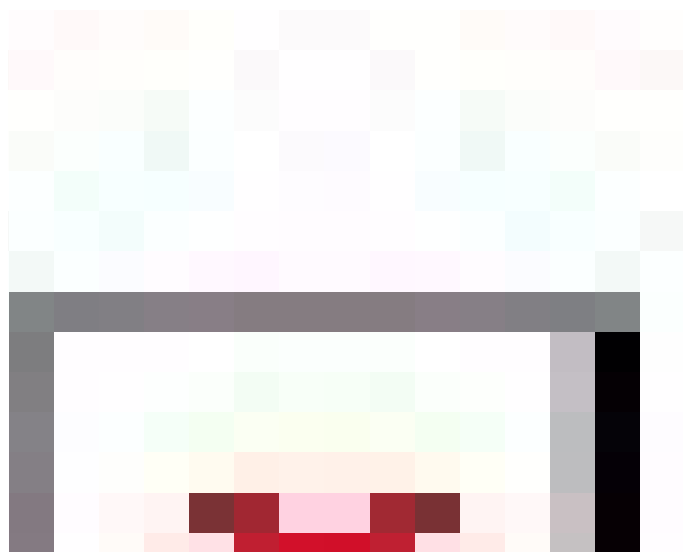

**Fig. S1** XRD pattern of WO<sub>3</sub> Precursor

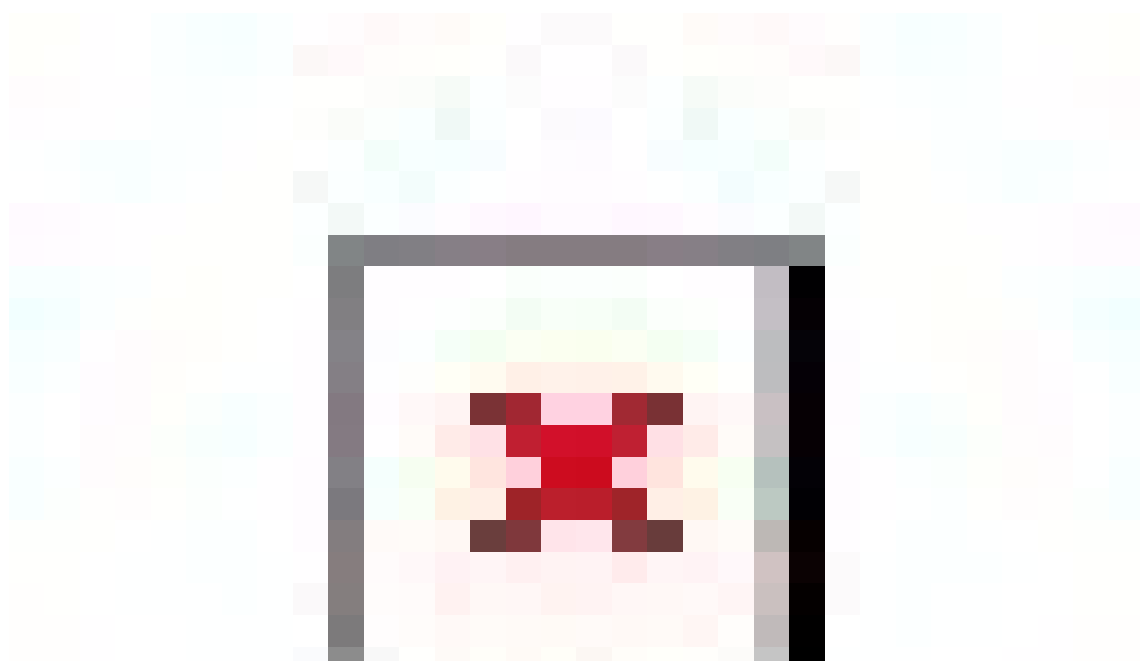

**Fig. S2** SEM images of WO<sub>3</sub> precursor.

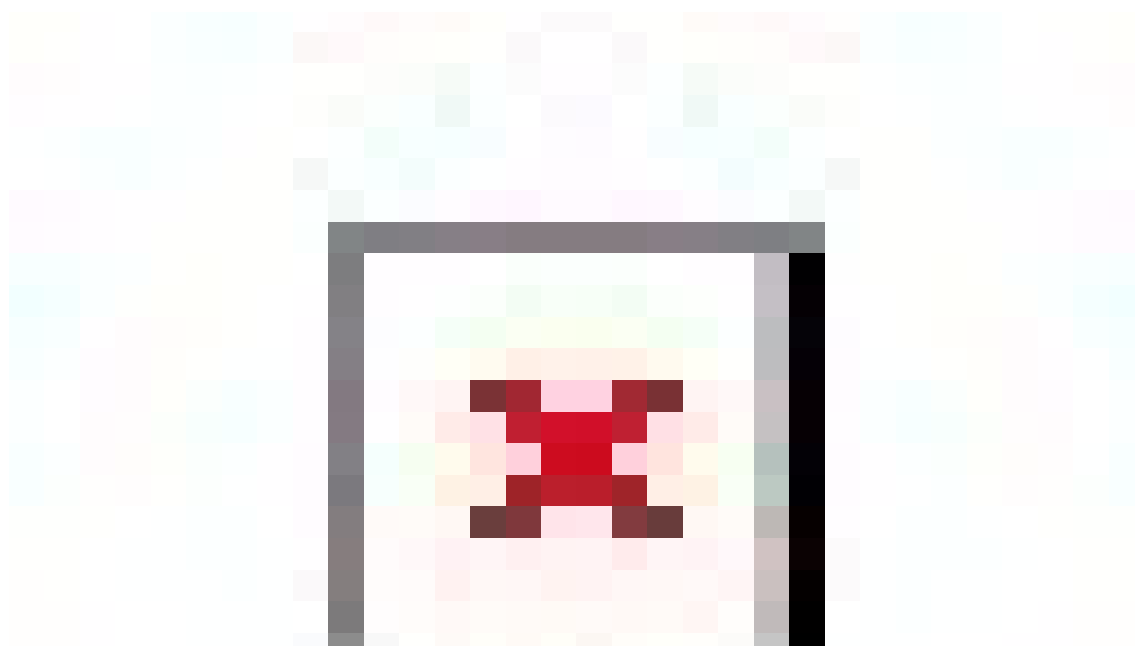

**Fig. S3** (a, b) SEM images of WN/CC, and corresponding element mapping of (c) W, (d) N.

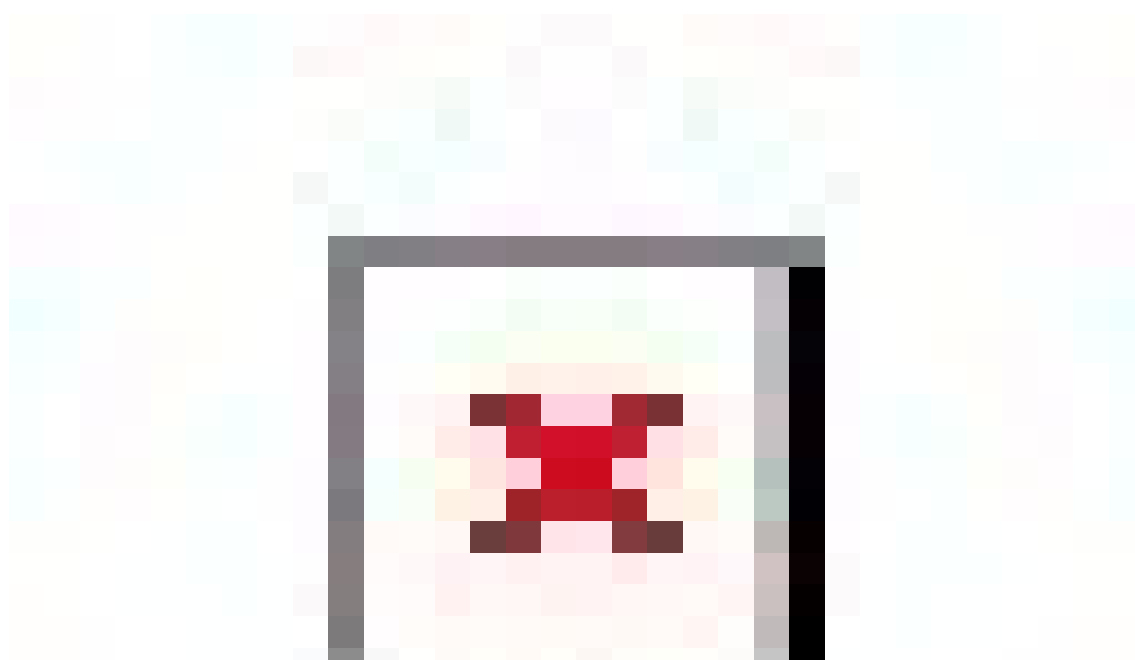

**Fig. S4** (a, d) HR-TEM images of WN/CC, and (b, c) corresponding elemental distribution maps of N and W.

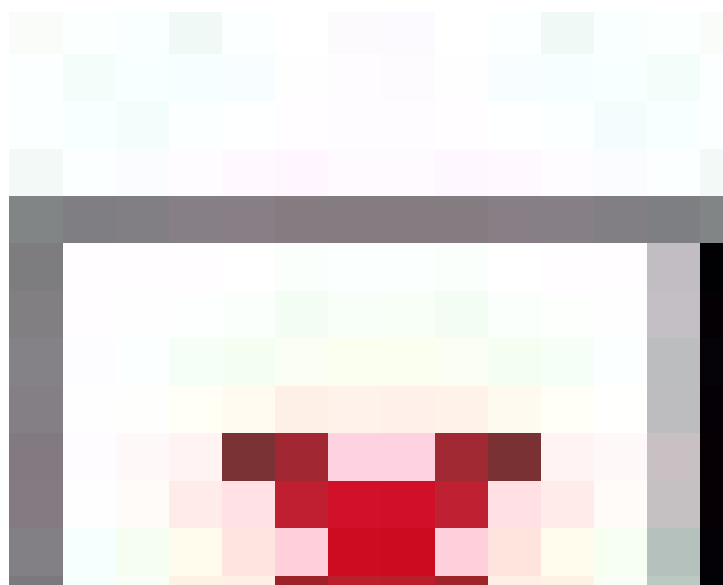

**Fig. S5** XPS survey scan spectra of the WN/CC

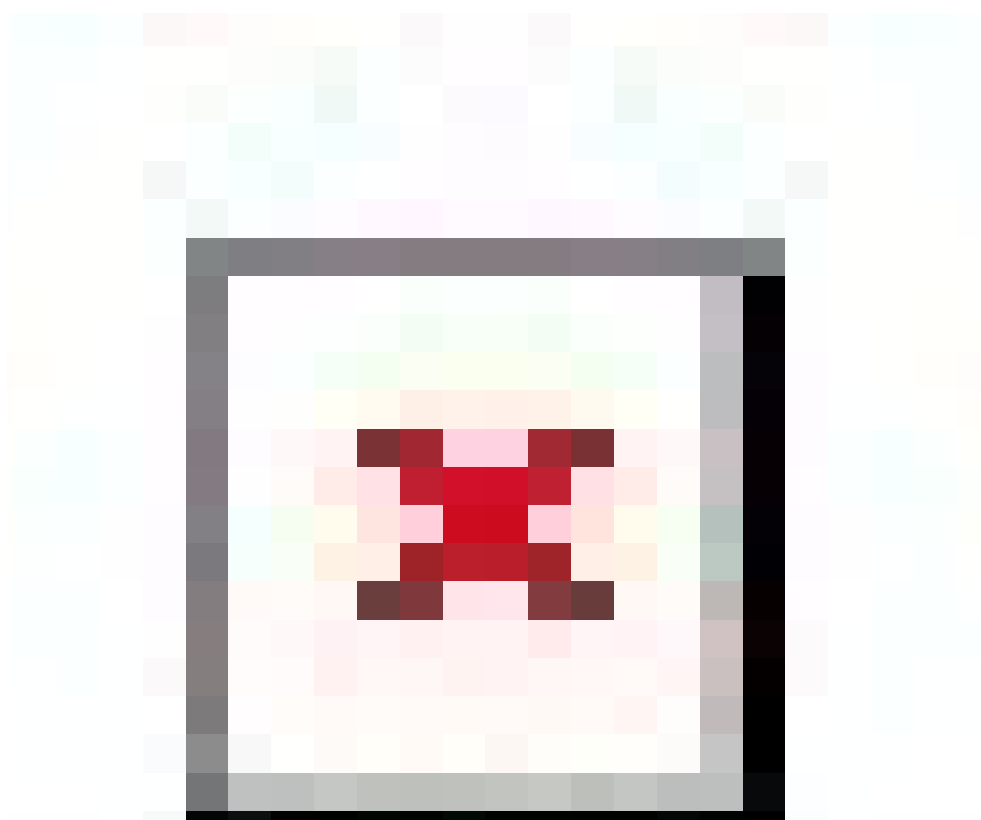

**Fig. S6** (a) The exchange current densities of Ru NP-WN/CC, Pt/C and Ru/C. Cyclic voltammetry curves at different scan rates ( $\text{mV s}^{-1}$ ) for (b) WN/CC, (c) Ru NP-WN/CC. (d) The current density differences vs. scan rates and corresponding yielded  $C_{dl}$ .

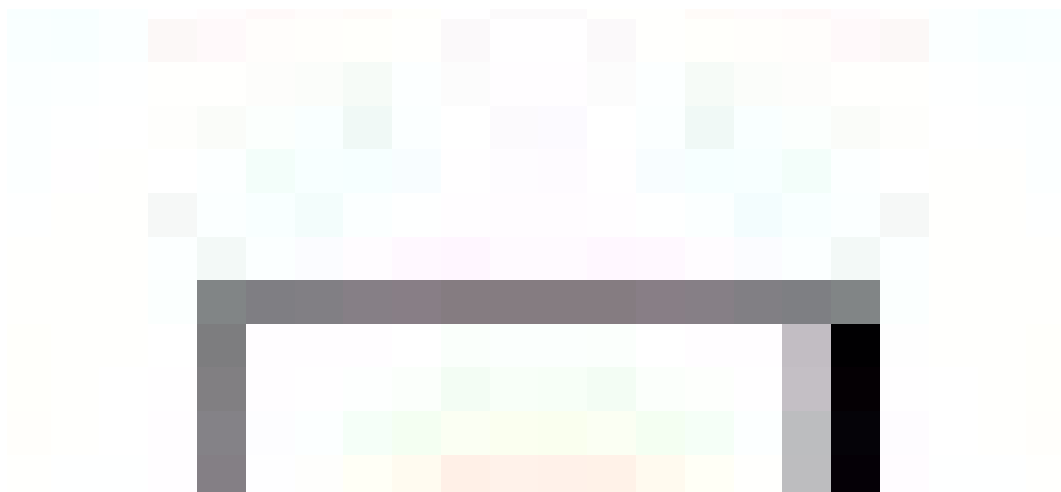

**Fig. S7** SEM images of Ru NP-WN/CC after durability test.

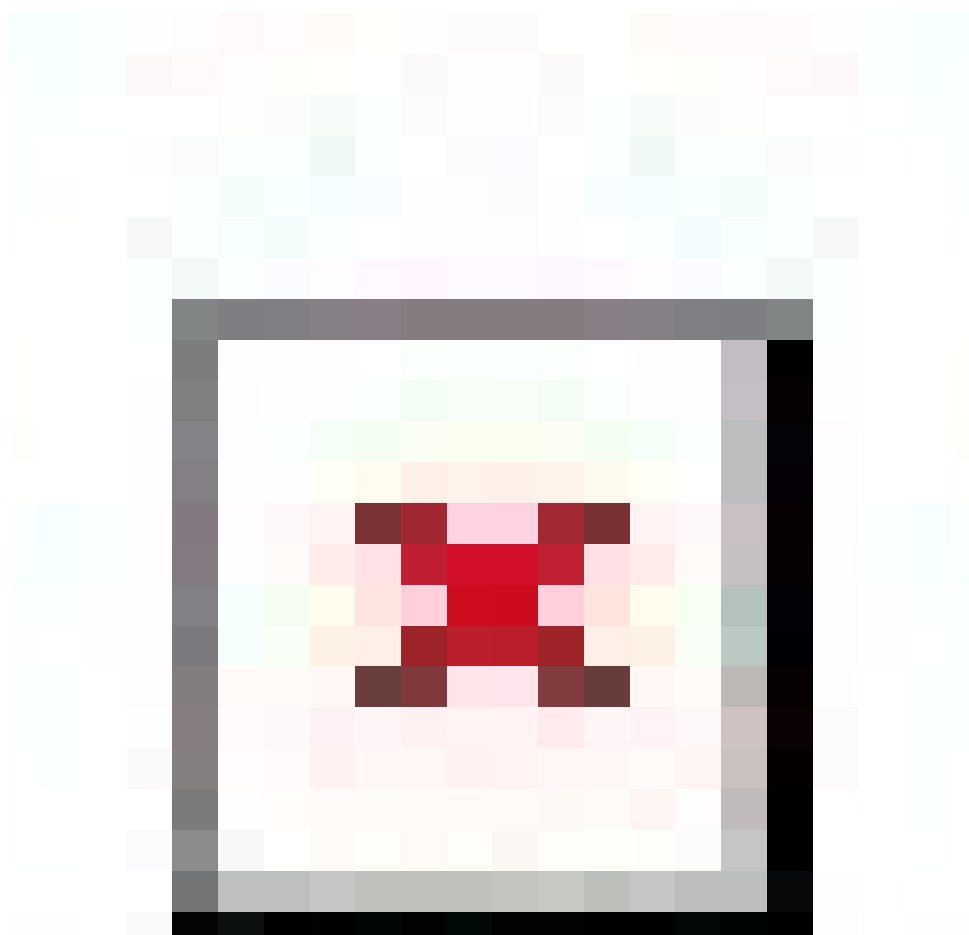

**Fig. S8** XPS spectra of the Ru NP-WN/CC after stability test: (a) Survey scan spectrum, (b) N 1s, (c) Ru 3p, (d) W 4f.

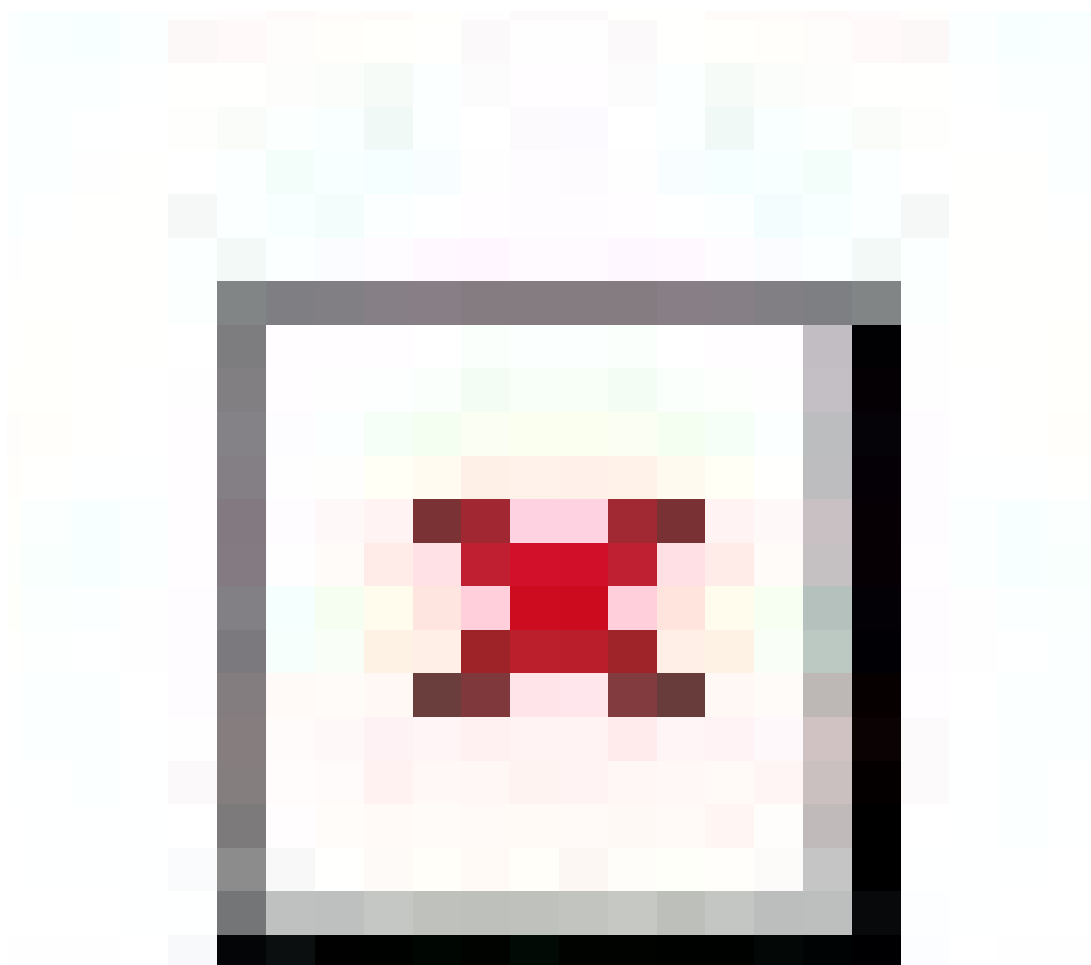

**Fig. S9** (a) Device diagram for measuring Faraday efficiency. (b) Diagram of the amount of  $\text{H}_2$  released over time in 1.0 M KOH.

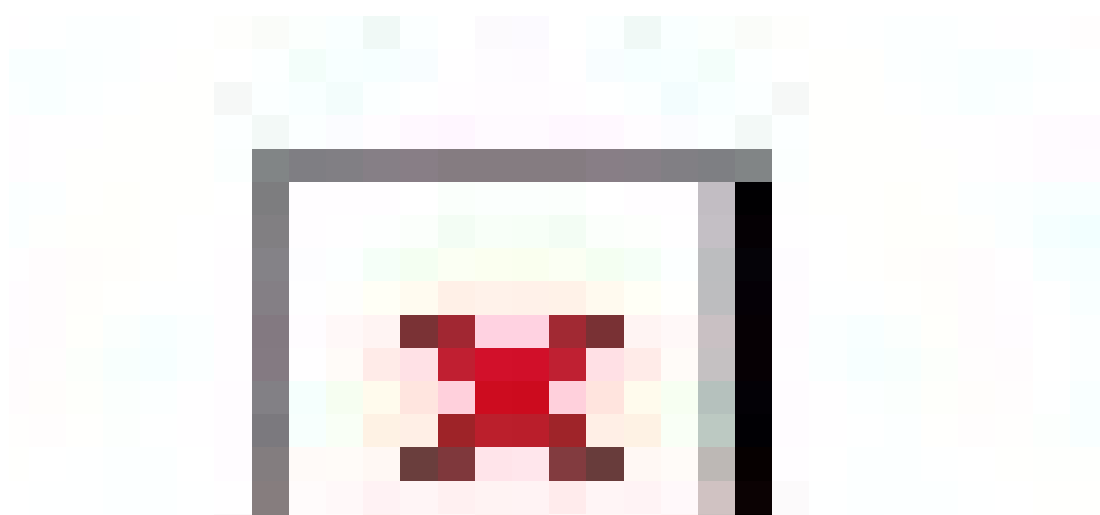

**Fig. S10** (a) Theoretical model of Ru NP-WN/CC system. (b) Bader charge analysis of  $\text{Ru}_1$ ,  $\text{Ru}_2$ ,  $\text{Ru}_3$ , and  $\text{Ru}_4$ .

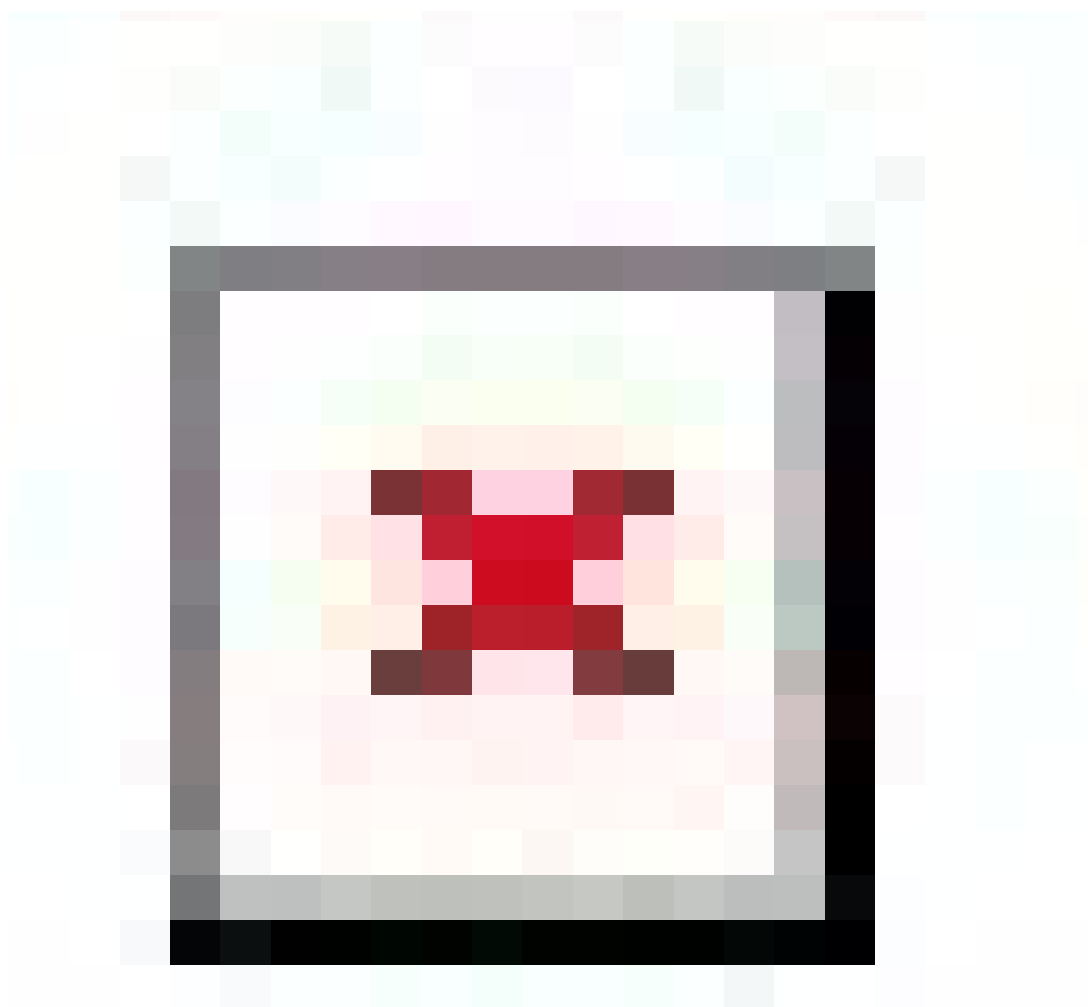

**Fig. S11** Simulation models and Bader charge analysis corresponding of (a) Ru<sub>1</sub>-H, (b) Ru<sub>2</sub>-H, (c) Ru<sub>3</sub>-H and (d) Ru<sub>4</sub>-H.

**Table S1.** Ru wt.% determined by inductively coupled plasma optical emission spectrometry (ICP-OES).

| Sample      | Ru wt.% |
|-------------|---------|
| Ru NP-WN/CC | 1.1     |

**Table S2.** Comparison of HER performance with recently reported HER catalysts in 1.0 M KOH.

| Catalysts                                 | Overpotential<br>/mV @ 10 mA<br>cm <sup>-2</sup> | Tafel slope<br>/ mV dec <sup>-1</sup> | Reference                                    |
|-------------------------------------------|--------------------------------------------------|---------------------------------------|----------------------------------------------|
| Ru NP-WN/CC                               | 9                                                | 29                                    | This work                                    |
| NS-Ru@NiHO/Ni <sub>5</sub> P <sub>4</sub> | 16                                               | 35                                    | <i>Adv. Funct. Mater.</i> 2023, 2212321      |
| Ru/Mo <sub>2</sub> CT <sub>x</sub>        | 78                                               | 49                                    | <i>Adv. Funct. Mater.</i> 2023, 2214375      |
| Ru/np-MoS <sub>2</sub>                    | 30                                               | 31                                    | <i>Nat. Commun.</i> 2021, 12, 1687           |
| CoRu <sub>0.5</sub> /CQDs                 | 18                                               | 39                                    | <i>Angew. Chem. Int. Ed.</i> 2021, 60, 3290  |
| RuNi/CQDs                                 | 13                                               | 40                                    | <i>Angew. Chem. Int. Ed.</i> 2020, 59, 1718  |
| Ru@N-CNFs                                 | 16                                               | 32                                    | <i>Small</i> , 2022, 2206781                 |
| NiRu <sub>0.13</sub> -BDC                 | 36                                               | 32                                    | <i>Nat. Commun.</i> 2021, 12, 1369           |
| Pt/RuCeO <sub>x</sub> -PA                 | 41                                               | 31                                    | <i>Angew. Chem. Int. Ed.</i> 2020, 59, 20423 |
| R-NiRu                                    | 16                                               | 40                                    | <i>Adv. Mater.</i> 2021, 33, 2104764         |
| PtSe <sub>2</sub> /Pt                     | 42                                               | 53                                    | <i>Angew. Chem. Int. Ed.</i> 2021, 60, 23388 |
| Dr-Pt                                     | 26                                               | 52                                    | <i>Adv. Mater.</i> 2022, 34, 2106973         |
| RuNP-RuSA@CFN-800                         | 33                                               | 37                                    | <i>Adv. Funct. Mater.</i> 2023, 33, 2213058  |
| RuCuO <sub>x</sub> /NC                    | 29                                               | 58                                    | <i>Appl. Catal. B.</i> 2023, 324, 122169     |
| Ni <sub>5</sub> P <sub>4</sub> -Ru        | 54                                               | 52                                    | <i>Adv. Mater.</i> 2020, 32, 1906972         |
